# Supplementary material
Source: Springer Nature journal article supplement (https://www.springermedizin.de/resource/supplementary/13075_2010_2902_MOESM10_ESM.pdf/9693146)

Figure 6

(A)

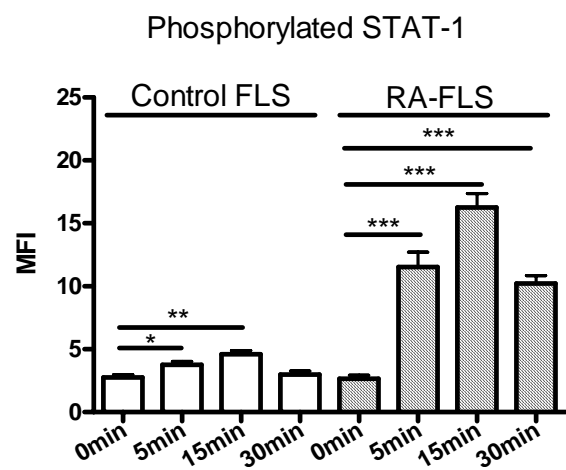

Phosphorylated STAT-1 in control FLS

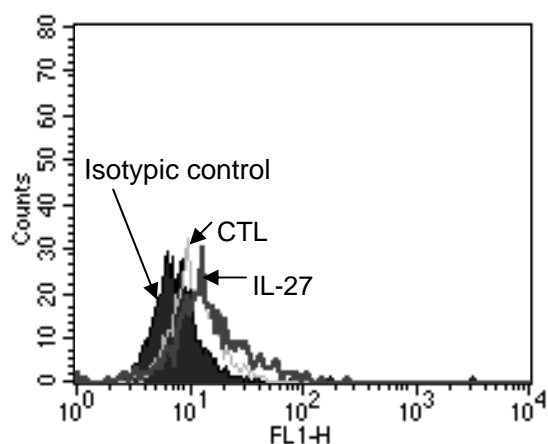

Phosphorylated STAT-1 in RA-FLS

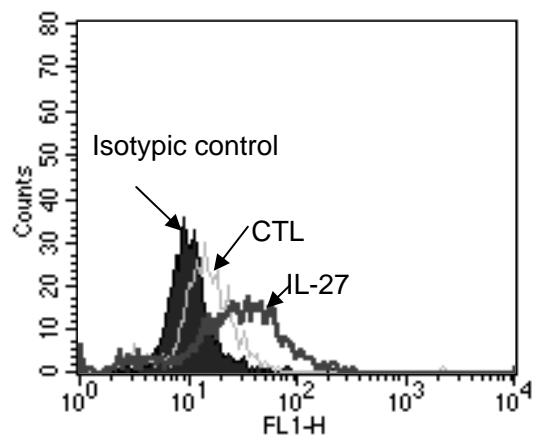

(B)

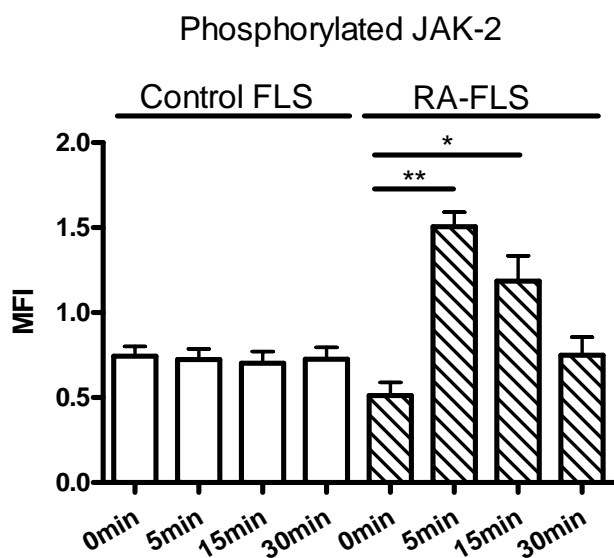

Phosphorylated JAK-2 in control FLS

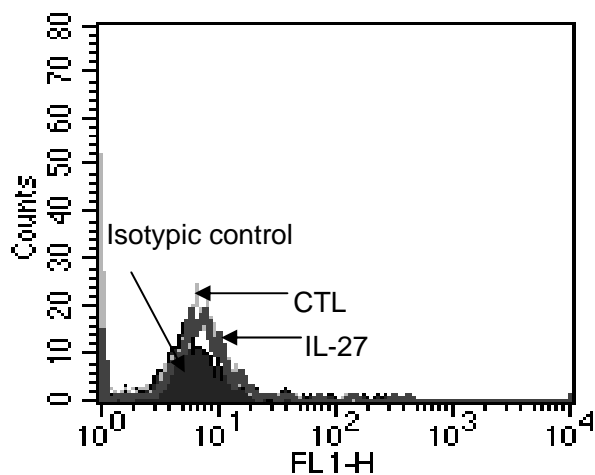

Phosphorylated JAK-2 in RA-FLS

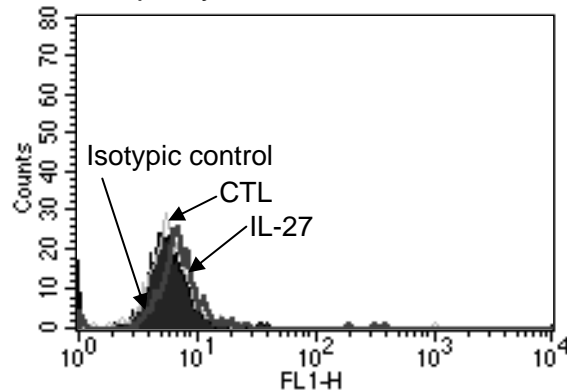

Supplement: MOESM10 [file 9693146]
